# Supplementary material
Source: Research Square preprint supplement (doi:10.21203/rs.3.rs-10102580/v1)
Supplement: Supplementary file 1 [file 5b07a5683101c63b455bf757.docx]

**Appendix A. Robustness Models**

Table A1 presents four additional logistic regression models estimated as robustness checks for the main results reported in Table 2. Models 1 and 2 replicate the baseline specifications for reactive and instrumental illegality justification respectively, excluding Political Polarization and using the full sample of approximately 21,000 respondents across all sixteen countries, including those where the left-right ideological self-placement scale was not administered in the 2023 wave. Models 1A and 2A replicate the baseline specifications including Political Polarization but incorporate country fixed effects to account for unobserved country-level heterogeneity. The results are broadly consistent across all specifications. Two patterns are worth noting. First, Party Identification is not statistically significant in Models 1 and 2 but becomes significant in Models 1A and 2A, suggesting that its effect is better captured once country-level heterogeneity is accounted for. Second, Political Polarization loses significance in Model 1A when country fixed effects are included, suggesting that part of its effect on reactive illegality justification may operate at the contextual rather than the individual level.

**Table A1. Logistic Regression Models of Reactive and Instrumental Illegality Justification: Robustness Checks**

| VARIABLES | Model 1 | Model 2 | Model 1A | Model 2A |
| --- | --- | --- | --- | --- |
|  |  |  |  |  |
| Party Identification | 0.049 | 0.064 | 0.083** | 0.069** |
|  | (0.087) | (0.073) | (0.036) | (0.027) |
| Political Polarization |  |  | 0.029 | 0.038*** |
|  |  |  | (0.018) | (0.011) |
| Institutional Distrust | -0.094** | -0.100** | -0.145*** | -0.178*** |
|  | (0.039) | (0.046) | (0.016) | (0.016) |
| Authoritarian Populist Attitudes | 0.127*** | 0.128*** | 0.095*** | 0.097*** |
|  | (0.016) | (0.017) | (0.017) | (0.015) |
| Popular Sovereignty Populism | 0.048*** | 0.054*** | 0.038*** | 0.035*** |
|  | (0.016) | (0.019) | (0.009) | (0.012) |
| Support for Democracy | -0.003 | -0.003 | 0.002 | 0.000 |
|  | (0.017) | (0.014) | (0.011) | (0.013) |
| Education | -0.189*** | -0.177*** | -0.117*** | -0.119*** |
|  | (0.041) | (0.040) | (0.015) | (0.018) |
| Age | -0.018*** | -0.019*** | -0.018*** | -0.020*** |
|  | (0.002) | (0.002) | (0.001) | (0.001) |
| Female | -0.068* | -0.086*** | -0.104* | -0.151*** |
|  | (0.035) | (0.028) | (0.053) | (0.043) |
| Constant | 0.822*** | 0.927*** | 1.173*** | 1.488*** |
|  | (0.283) | (0.353) | (0.132) | (0.124) |
|  |  |  |  |  |
| Observations | 21,321 | 21,414 | 13,847 | 13,907 |

Robust standard errors in parentheses

*** p<0.01, ** p<0.05, * p<0.1

Source: Author's elaboration with data from the AmericasBarometer 2023, LAPOP.

Table A2 presents four logit models replicating the main specifications from Table 2, with the addition of V-Dem's Liberal Democracy Index as a country-level control variable. These models are estimated to address concerns about the democratic heterogeneity of the sample and the absence of countries with traditionally stronger democratic institutions, such as Chile and Uruguay, which did not administer the CRG items in the 2023 wave. By controlling for each country's level of liberal democracy, I assess whether the individual-level effects identified in Table 2 are artifacts of variation in country-level democratic quality rather than reflections of individual attitudinal patterns. Results are fully consistent with the main models: all variables maintain their sign, magnitude, and level of statistical significance across all four specifications. The Liberal Democracy Index itself is not statistically significant in any model, which is expected given the limited number of country-level clusters (n=13), but more importantly indicates that country-level democratic quality does not absorb the individual-level effects of party identification, institutional distrust, or populist attitudes. These findings suggest that the attitudinal patterns identified in the main analysis are robust to the democratic composition of the sample.

**Table A2. Logistic Regression Models of Reactive and Instrumental Illegality Justification: Robustness Checks**

|  | (1) | (2) | (3) | (4) |
| --- | --- | --- | --- | --- |
| VARIABLES | Model 1 | Model 2 | Model 1A | Model 2A |
|  |  |  |  |  |
| Party Identification | 0.124** | 0.107** | -0.075 | 0.057 |
|  | (0.054) | (0.049) | (0.094) | (0.110) |
| Political Polarization | 0.040* | 0.049*** | 0.040* | 0.049*** |
|  | (0.021) | (0.014) | (0.021) | (0.014) |
| Institutional Distrust | -0.152*** | -0.180*** | -0.165*** | -0.183*** |
|  | (0.019) | (0.020) | (0.017) | (0.018) |
| Party ID × Institutional Distrust |  |  | 0.047* | 0.012 |
|  |  |  | (0.024) | (0.028) |
| Authoritarian Populist Attitudes | 0.093*** | 0.094*** | 0.093*** | 0.094*** |
|  | (0.018) | (0.016) | (0.017) | (0.016) |
| Popular Sovereignty Populism | 0.033*** | 0.030** | 0.033*** | 0.030** |
|  | (0.011) | (0.013) | (0.011) | (0.013) |
| Support for Democracy | 0.010 | 0.009 | 0.010 | 0.009 |
|  | (0.012) | (0.014) | (0.012) | (0.014) |
| Education | -0.133*** | -0.133*** | -0.132*** | -0.133*** |
|  | (0.016) | (0.018) | (0.016) | (0.018) |
| Age | -0.018*** | -0.020*** | -0.018*** | -0.020*** |
|  | (0.001) | (0.001) | (0.001) | (0.001) |
| Female | -0.098* | -0.143*** | -0.099* | -0.143*** |
|  | (0.053) | (0.041) | (0.053) | (0.041) |
| Liberal Democracy Index (V-Dem) | 0.125 | 0.154 | 0.122 | 0.153 |
|  | (0.182) | (0.228) | (0.180) | (0.229) |
| Constant | 1.298*** | 1.614*** | 1.349*** | 1.627*** |
|  | (0.180) | (0.168) | (0.166) | (0.168) |
|  |  |  |  |  |
| Observations | 13,847 | 13,907 | 13,847 | 13,907 |

Robust standard errors in parentheses

*** p<0.01, ** p<0.05, * p<0.1

Source: Author's elaboration with data from the AmericasBarometer 2023, LAPOP and V-Dem.

**Appendix B. VIF Tests**

Table B1 presents the VIF test for Model 1 of Table 2 of the main document. VIF tests were estimated using OLS regression with the same model specification as the main logistic regression models. All VIF values fall well below the conventional threshold of 10, confirming the absence of problematic multicollinearity in the baseline model.

**Table B1. VIF test for Model 1 of Table 2**

| **Variable** | **VIF** | **1/VIF** |
| --- | --- | --- |
| Institutional Distrust | 1.24 | 0.803 |
| Authoritarian Populist Attitudes | 1.24 | 0.805 |
| Education | 1.21 | 0.828 |
| Support for Democracy | 1.16 | 0.863 |
| Popular Sovereignty Populism | 1.14 | 0.874 |
| Age | 1.13 | 0.887 |
| Political Polarization | 1.06 | 0.947 |
| Party Identification | 1.05 | 0.950 |
| Female | 1.01 | 0.989 |
| Mean VIF | 1.14 |  |

Source: Author's elaboration with data from the AmericasBarometer 2023, LAPOP.

Table B2 presents the VIF test for Model 1A of Table 2 of the main document. VIF tests were estimated using OLS regression with the same model specification as the main logistic regression models. With the exception of Party Identification and the interaction term, all VIF values fall well below the conventional threshold of 10. The elevated values for these two variables are expected given the mathematical properties of multiplicative terms and do not indicate substantive multicollinearity.

**Table B2. VIF test for Model 1A of Table 2**

| **Variable** | **VIF** | **1/VIF** |
| --- | --- | --- |
| Party Identification | 7.69 | 0.130 |
| Party ID × Institutional Distrust | 7.55 | 0.133 |
| Institutional Distrust | 1.61 | 0.620 |
| Authoritarian Populist Attitudes | 1.24 | 0.805 |
| Support for Democracy | 1.16 | 0.863 |
| Popular Sovereignty Populism | 1.14 | 0.874 |
| Education | 1.21 | 0.827 |
| Age | 1.13 | 0.885 |
| Female | 1.01 | 0.989 |
| Political Polarization | 1.06 | 0.946 |
| Mean VIF | 2.48 |  |

Source: Author's elaboration with data from the AmericasBarometer 2023, LAPOP.
